# Supplementary material for: Rhodamine based pH-sensitive “intelligent” polymers as lysosome targeting probes and their imaging applications in vivo
Source: Royal Society of Chemistry journal article supplement (doi:10.1039/c4py00646a), 2014-01-01
Supplement: c4py00646a1.pdf [file c4py00646a1.pdf]

## Supporting Information

### Rhodamine based pH-sensitive “intelligent” polymer as lysosome targeting probes and their imaging application *in vivo*

Kang-Kang Yu,<sup>a</sup> Kun Li,<sup>\*a, b</sup> Ji-Ting Hou,<sup>a</sup> Jin Yang,<sup>a</sup> Yong-Mei Xie<sup>b\*</sup> and Xiao-Qi Yu<sup>a\*</sup>

<sup>a</sup>Key Laboratory of Green Chemistry and Technology (Ministry of Education), College of Chemistry, Sichuan University, Chengdu, 610064, China Fax: (86)-28-85415886 ; Tel: (86)-28-85415886; E-mail: kli@scu.edu.cn; xqyu@scu.edu.cn.

<sup>b</sup> State Key Laboratory of Biotherapy, West China Hospital, West China Medical School, Sichuan University, Chengdu 610041, China E-mail: xieym@scu.edu.cn

## Contents

|                                                                                             |    |
|---------------------------------------------------------------------------------------------|----|
| Table S1 GPC data of <b>P-1</b> and <b>P-2</b>                                              | S2 |
| Table S2 Diameter sizes of <b>P-1</b> and <b>P-2</b> determined by dynamic light scattering | S2 |
| Figure S1 Standard curves of <b>M-1</b> and <b>M-2</b>                                      | S2 |
| Figure S2 <sup>1</sup> H-NMR spectra recorded for <b>Rh-1</b>                               | S3 |
| Figure S3 <sup>1</sup> H-NMR spectra recorded for <b>Rh-2</b>                               | S3 |
| Figure S4 <sup>1</sup> H-NMR spectra recorded for <b>M-1</b>                                | S4 |
| Figure S5 <sup>1</sup> H-NMR spectra recorded for <b>M-2</b>                                | S4 |
| Figure S6 <sup>1</sup> H-NMR spectra recorded for <b>P-1</b>                                | S5 |
| Figure S7 <sup>1</sup> H-NMR spectra recorded for <b>P-2</b>                                | S5 |

**Table S1** GPC data of **P-1** and **P-2**

|            | Mn (Daltons) | Mw (Daltons) | PDI  |
|------------|--------------|--------------|------|
| <b>P-1</b> | 7940         | 11140        | 1.40 |
| <b>P-2</b> | 2250         | 4100         | 1.83 |

**Table S2.** Diameter sizes of **P-1** and **P-2** at different concentrations determined by dynamic light scattering.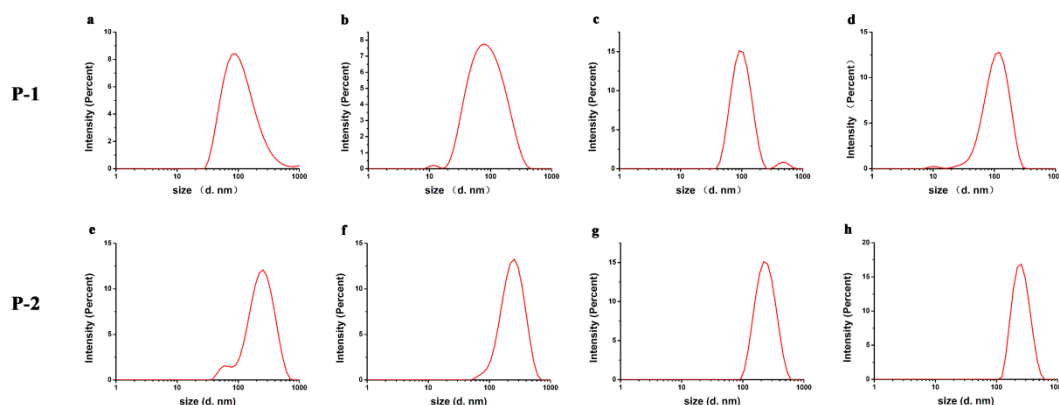

|            | 10 µg/ml |      | 25 µg/ml |      | 50 µg/ml |      | 100 µg/ml |      |
|------------|----------|------|----------|------|----------|------|-----------|------|
|            | size/nm  | PDI  | size/nm  | PDI  | size/nm  | PDI  | size/nm   | PDI  |
| <b>P-1</b> | 128.79   | 0.45 | 125.57   | 0.44 | 109.55   | 0.39 | 113.80    | 0.36 |
| <b>P-2</b> | 200.40   | 0.25 | 250.97   | 0.28 | 202.40   | 0.27 | 264.93    | 0.24 |

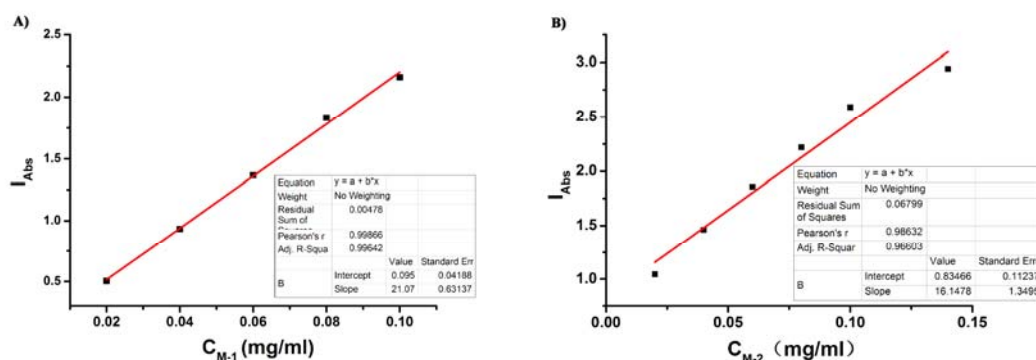**Figure S1** A) Standard curves of **M-1**, the concentrations of **M-1** ethanol solution: 0.02, 0.04, 0.06, 0.08, 0.10 mg/ml. B) Standard curves of **M-2**, the concentrations of **M-2** ethanol solution: 0.02, 0.04, 0.06, 0.08, 0.10, 0.12 mg/ml.

The rhodamine content of **P-1** and **P-2** were calculated to be 7.79% and 6.76% by the following equation:

$$n = C_{MR} / (0.2/M)$$

n: The molar contents of rhodamine derivatives in the polymer

M: The average molecular weight of polymer unit (**P-1** and **P-2** both are 86.09 g/mol)

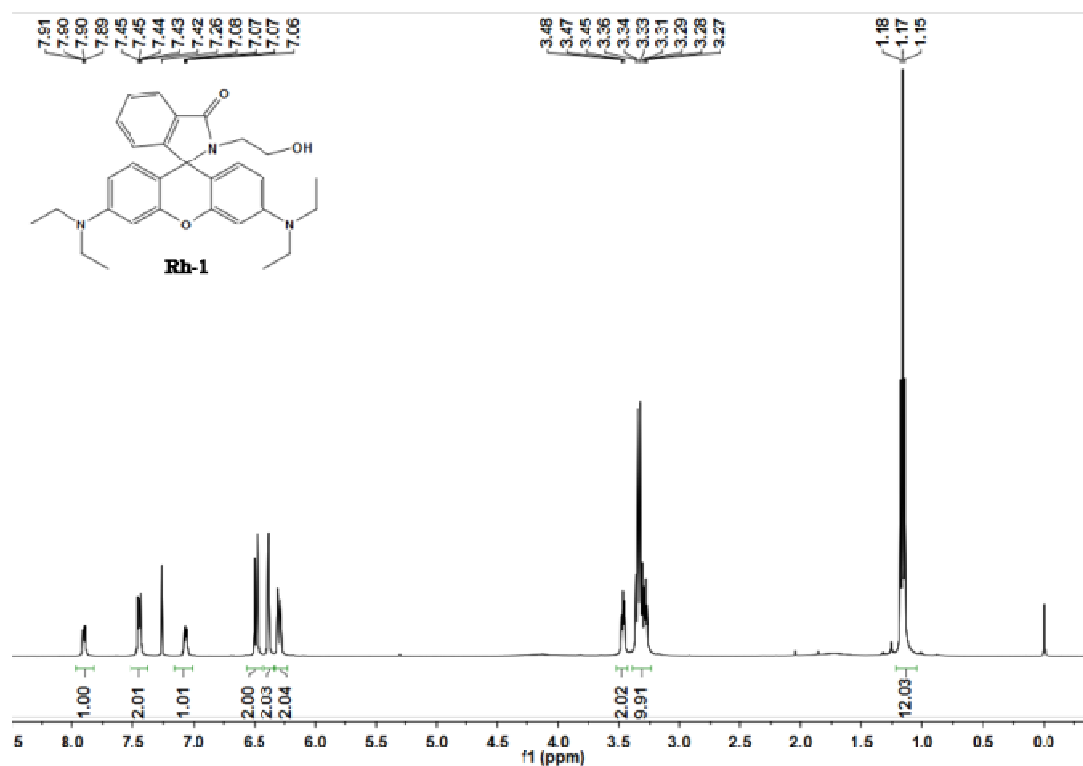

**Figure S2** <sup>1</sup>H-NMR spectra recorded for **Rh-1** (in CDCl<sub>3</sub>)

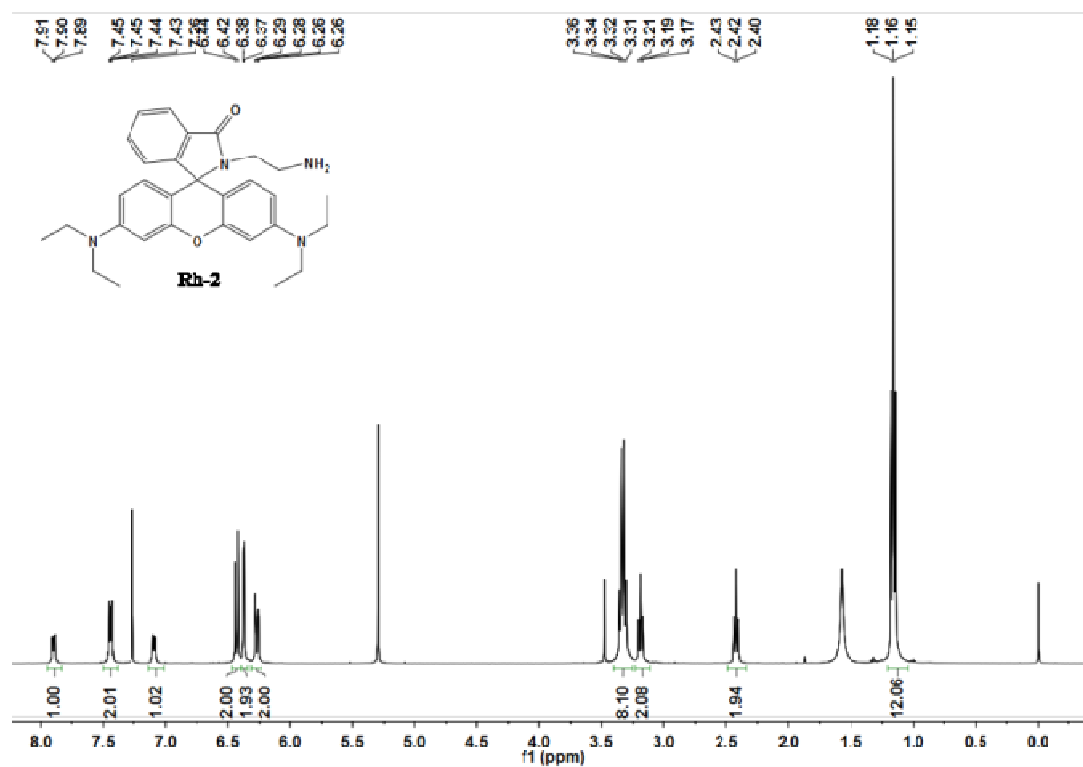

**Figure S3** <sup>1</sup>H-NMR spectra recorded for **Rh-2** (in CDCl<sub>3</sub>)

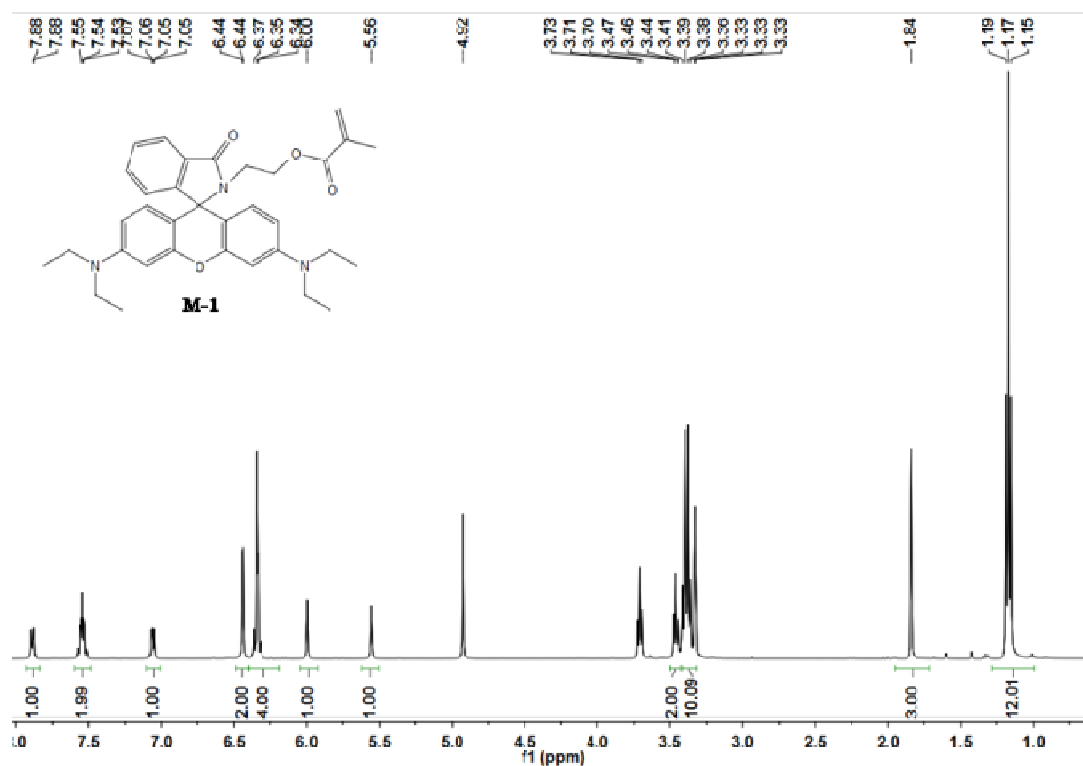

**Figure S4**  $^1\text{H}$ -NMR spectra recorded for **M-1** (in  $\text{CD}_3\text{OD}$ )

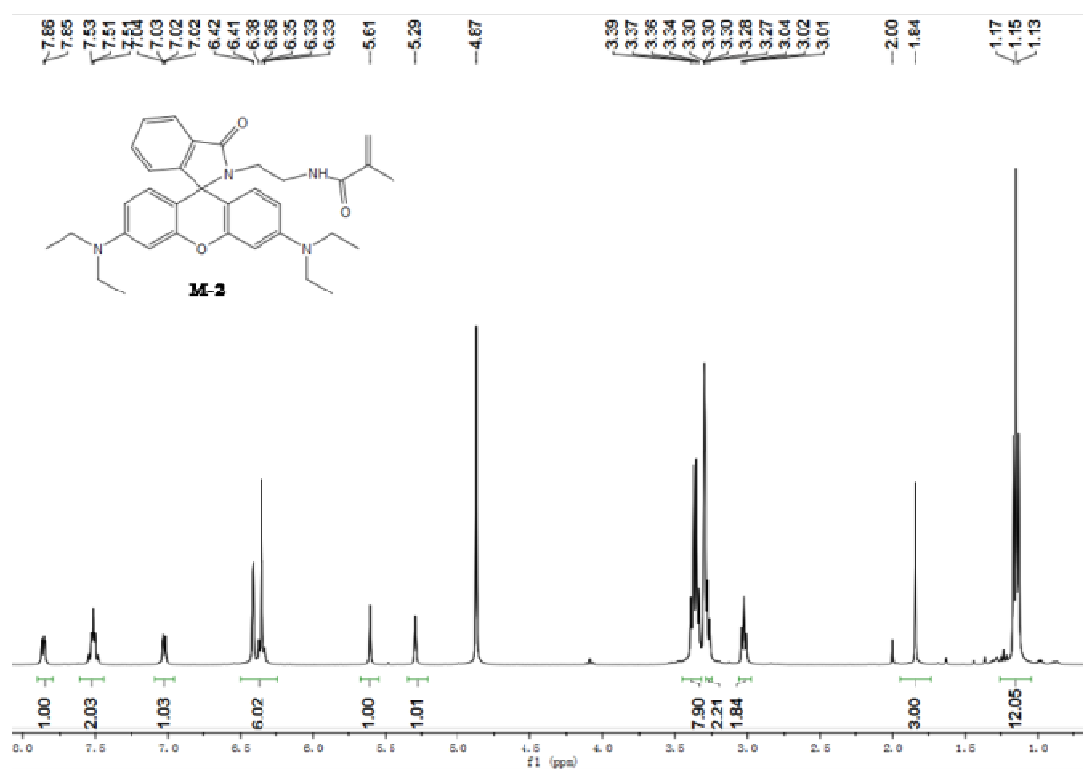

**Figure S5**  $^1\text{H}$ -NMR spectra recorded for **M-2** (in  $\text{CD}_3\text{OD}$ )

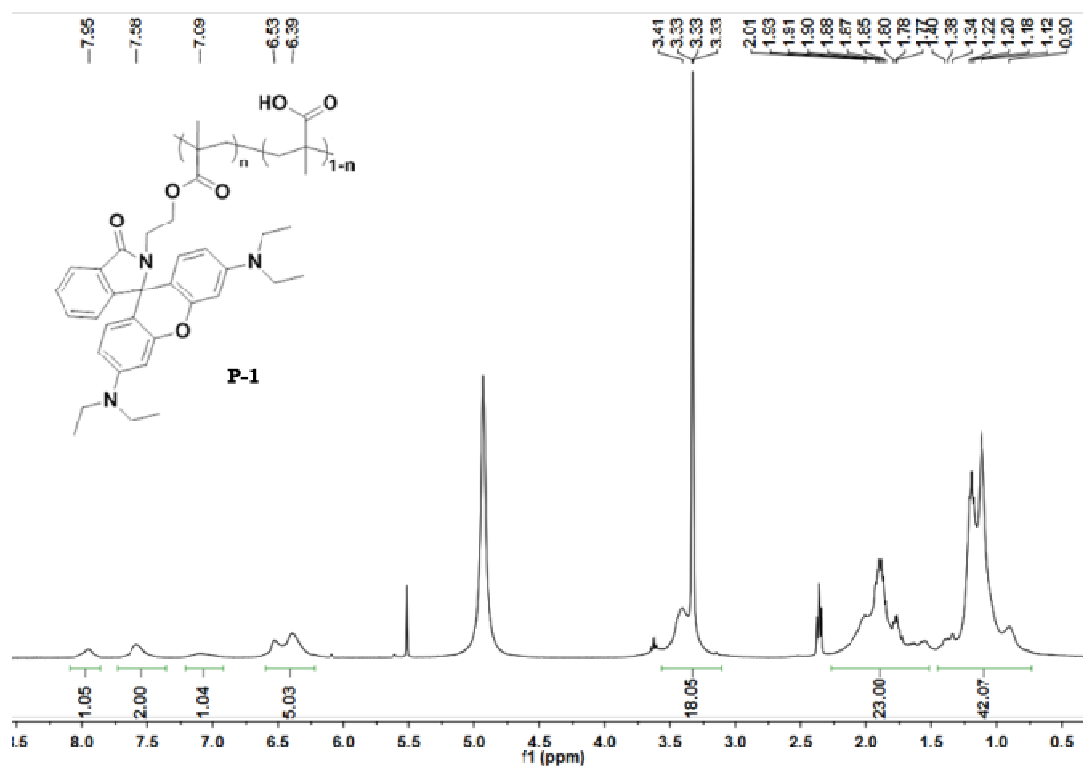

Figure S6  $^1\text{H}$ -NMR spectra recorded for **P-1** (in  $\text{CD}_3\text{OD}$ )

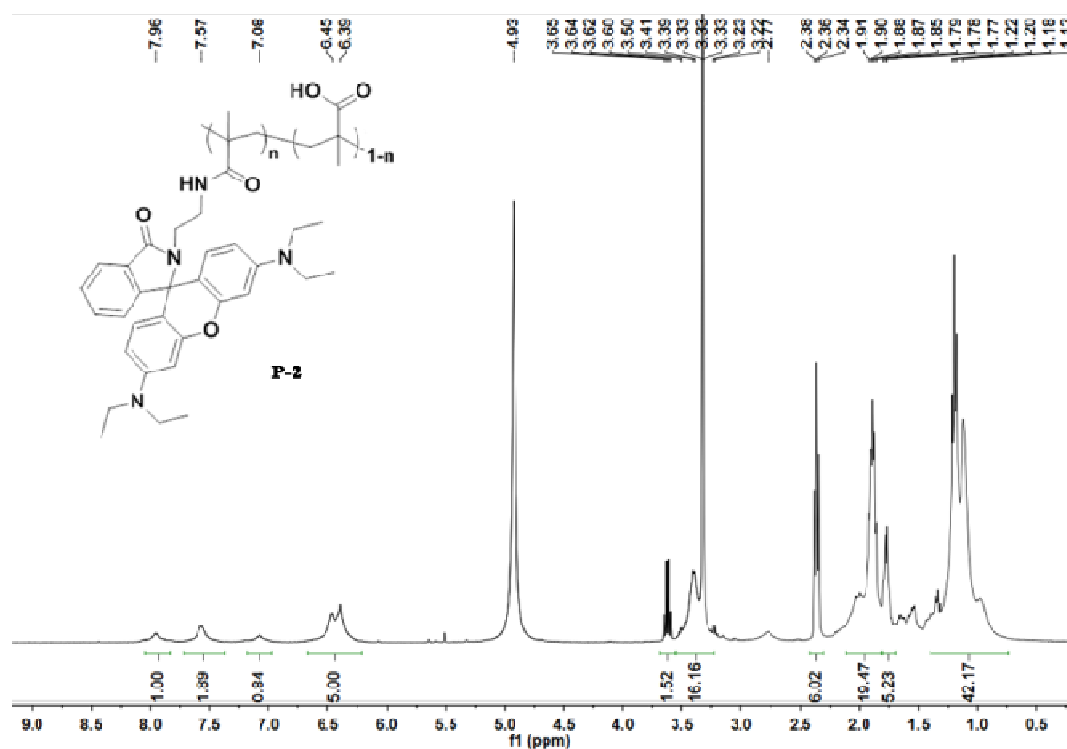

Figure S7  $^1\text{H}$ -NMR spectra recorded for **P-2** (in  $\text{CD}_3\text{OD}$ )
